# Supplementary material
Source: ML conference proceedings conference paper supplement (https://openaccess.thecvf.com/content/CVPR2024/html/Zhang_ProxyCap_Real-time_Monocular_CVPR_2024_paper.html)
Supplement: Supplementary file 1 [file Zhang_ProxyCap_Real-time_Monocular_CVPR_2024_supplemental.zip]

Archive with 2 entries (2 files):
- 9442_supp/supp.pdf
- 9442_supp/video.mp4
